1 **Title:**

2 **Implementation of national guidelines on antenatal magnesium sulfate for neonatal**  
3 **neuroprotection in England, Scotland and Wales: Extended evaluation of the effectiveness**  
4 **and cost-effectiveness of the National PReCePT Programme**

5

6 **Word count:** 3947

7

8 **Authors:**

9 Hannah B Edwards(1,2), Carlos Sillero-Rejon(1,2), Hugh McLeod(1,2), Elizabeth M Hill(1,2),  
10 Brent C Opmeer(2,3), Colin Peters(4), David Odd(5,6), Frank de Vocht(1,2), Karen Luyt(7,8)

11 **Institutions:**

- 12 1. Population Health Sciences, Bristol Medical School, University of Bristol, Beacon House  
13 Queens Road Bristol, BS8 1QU, UK  
14 2. The National Institute for Health and Care Research Applied Research Collaboration West  
15 (NIHR ARC West) at University Hospitals Bristol and Weston NHS Foundation Trust, 9th  
16 Floor, Whitefriars, Lewins Mead, Bristol, BS1 2NT, UK  
17 3. Vilans, National Center of Expertise for Long Term Care, P.O. Box 8228, 3503 RE, Utrecht,  
18 The Netherlands  
19 4. Neonatology, Royal Hospital for Children Glasgow, 1345 Govan Road, Govan, Glasgow,  
20 G51 4TF, UK  
21 5. Population Medicine, Cardiff University, Heath Park, Cardiff, CF14 4YS, UK.  
22 6. Neonatology, Cardiff and Vale University Health Board University Hospital of Wales,  
23 Heath Park, Cardiff, CF14 4XW, UK  
24 7. Translational Health Sciences, Bristol Medical School, University of Bristol, Beacon House  
25 Queens Road Bristol, BS8 1QU, UK  
26 8. Neonatology, St Michael's Hospital, Southwell Street, Bristol, BS2 8EG, UK

27

28

29 **Corresponding author:** Hannah B Edwards [Hannah.edwards@bristol.ac.uk](mailto:Hannah.edwards@bristol.ac.uk)

30 **ABSTRACT**

31 **Background:** Since 2015, UK national guidelines have recommended antenatal magnesium  
32 sulfate (MgSO<sub>4</sub>) for mothers in preterm labour (<30 weeks' gestation) to reduce the risk of  
33 cerebral palsy in the preterm baby. However, implementation of this guideline in clinical  
34 practice was slow, and MgSO<sub>4</sub> use varied between maternity units. In 2018, the PReCePT  
35 programme, an evidence-based Quality Improvement intervention to improve use of  
36 MgSO<sub>4</sub>, was rolled-out across England. Earlier evaluation found this programme to be  
37 effective and cost-effective over the first 12 months. We extended the original evaluation to  
38 determine the programme's longer-term impact over four years, its impact in later preterm  
39 births, impact of the COVID-19 pandemic, and to compare MgSO<sub>4</sub> use in England, Scotland,  
40 and Wales.

41 **Methods:** Quasi-experimental longitudinal study using data from the National Neonatal  
42 Research Database on babies born <30 weeks' gestation and admitted to an NHS neonatal  
43 unit. Primary outcome was the proportion of eligible mothers receiving MgSO<sub>4</sub>, aggregated  
44 to the national level. Impact of PReCePT on MgSO<sub>4</sub> use was estimated using multivariable  
45 linear regression. The net monetary benefit (NMB) of the programme was estimated.

46 **Results:** MgSO<sub>4</sub> administration rose from 65.8% in 2017 to 85.5% in 2022 in England.  
47 PReCePT was associated with 5.8 percentage points improvement in uptake (95%CI 2.69 to  
48 8.86, p<0.001). Improvement was greater when including older preterm births (<34 weeks'  
49 gestation, 8.67 percentage points, 95%CI 6.38 to 10.96, p<0.001). Most gains occurred in the  
50 first two years following implementation. PReCePT had a NMB of £597,000 with 89%  
51 probability of being cost-effective. Following implementation, English uptake appeared to

52 accelerate compared to Scotland and Wales. There was some decline in use coinciding with  
53 the onset of the pandemic.

54 **Conclusions:** The PReCePT Quality Improvement programme cost-effectively improved use  
55 of antenatal MgSO<sub>4</sub>, with benefits to the babies who have been protected from cerebral  
56 palsy.

57

#### 58 **What is already known on this topic**

- 59 • Antenatal magnesium sulphate (MgSO<sub>4</sub>) reduces the risk of cerebral palsy in babies born  
60 preterm.
- 61 • The National PReCePT Quality Improvement Programme (NPP) effectively and cost-  
62 effectively improved use of MgSO<sub>4</sub> in England in the first 12 months of implementation,  
63 but sustaining quality improvements over time is often challenging.

#### 64 **What this study adds**

- 65 • Using a quasi-experimental design and routinely collected, longitudinal, patient-level  
66 data, this study found that the NPP had sustained effectiveness and cost-effectiveness  
67 over four years following implementation.
- 68 • Improvement may have been accelerated in England, compared to Scotland and Wales,  
69 where the NPP was not formally implemented.

#### 70 **How this study might affect research, practice or policy**

- 71 • This study demonstrates that dedicated national programmes can cost-effectively
- 72 achieve improvements in perinatal care. The PReCePT model could be used as an
- 73 implementation blueprint for other quality improvement initiatives in perinatal care.

## 74 INTRODUCTION

75 Since 2015 the World Health Organisation (WHO)(1) and the UK National Institute for Health  
76 and Care Excellence (NICE)(2) have recommended administration of magnesium sulfate  
77 ( $\text{MgSO}_4$ ) in preterm deliveries <30 weeks' gestation as a core part of maternity care. This  
78 follows strong evidence that when given antenatally to women in preterm labour,  $\text{MgSO}_4$   
79 reduces the risk of cerebral palsy (CP) in preterm babies by around 30%(3). Historically, use  
80 of this treatment has been inconsistent, with only 64% of eligible women in England being  
81 treated in 2017. High regional variation in uptake also indicates inequalities in perinatal  
82 care(4).

83 As well as the significant impact of CP on affected individuals and their families(5), there are  
84 lifetime societal costs of approximately £1m per affected individual(6), and £1.8 billion  
85 annually on NHS clinical negligence litigation (half of the total NHS litigation expenditure)(7).  
86 Incidence of CP has been estimated at around 1.5 per 1000 livebirths in the UK(8), with  
87 preterm birth as the leading risk factor(9-11). This highlights the importance of funding  
88 effective, and cost-effective, strategies to reduce the risk of CP associated with preterm  
89 birth. It is estimated that one case of CP can be prevented, below 30 weeks' gestation, for  
90 every 37 mothers treated with  $\text{MgSO}_4$ , and around 200 cases of CP per year could be  
91 avoided by consistent administration of  $\text{MgSO}_4$  during labour(3).

92 In 2018, NHS England rolled-out the National PReCePT (Prevention of cerebral palsy in  
93 preterm labour) Programme (NPP). This was a quality improvement (QI) programme for  
94 maternity units, providing clinical guidance, training, learning resources, midwife backfill  
95 funding, and QI support, to improve maternity staff awareness, and increase use of  $\text{MgSO}_4$

96 for mothers in preterm labour. The aim was to reach  $\geq 85\%$  uptake in eligible mothers across  
97 all maternity units in England. The programme was delivered by regional Academic Health  
98 Science Networks (AHSNs, now Health Innovation Networks). Evaluation of the first 12  
99 months of the programme found it to be effective, improving  $\text{MgSO}_4$  use by an estimated  
100 6.3 percentage points, with an estimated net monetary benefit of £866 per preterm baby,  
101 and  $>95\%$  probability of being cost-effective(12). However it is unknown whether these  
102 improvements were sustained over time, and sustainability in large scale implementation  
103 programmes is often a problem (and measurement of sustained effect often neglected)(13).

104 The primary aim of this study, therefore, was to evaluate the NPP's longer-term, sustained  
105 effectiveness and cost-effectiveness over the first four years following implementation. A  
106 key secondary aim was to explore the impact of the NPP on all babies born up to 34 weeks'  
107 gestation; NICE guidelines recommend treatment for births up to 30 weeks', and  
108 'consideration of treatment' for older preterm births up to 34 weeks'. Other secondary aims  
109 were to explore the impact of the COVID-19 pandemic on  $\text{MgSO}_4$  use, and to compare  
110  $\text{MgSO}_4$  use in England with that in the devolved nations Scotland and Wales. This evaluation  
111 is part of a larger programme of work, including qualitative interviews to explore how the  
112 devolved nations were responding to the NICE guidance, reported elsewhere(14).

## 113 **METHODS**

### 114 **Design**

115 This was a quasi-experimental study for the evaluation of the NPP's effectiveness and cost-  
116 effectiveness. The pre-registered Statistical Analysis Plan and Health Economic Analysis Plan  
117 were uploaded to the Open Science Framework prior to analyses: <https://osf.io/be76s/>.

## 118 **Intervention**

119 The intervention being implemented was the National PReCePT Programme (NPP), as  
120 described above and fully detailed elsewhere(12), for the adoption of MgSO<sub>4</sub> as a  
121 neuroprotectant in preterm births.

## 122 **Setting**

123 NHS maternity units in England, Scotland and Wales. Within maternity units, analysis was  
124 performed on aggregated data on babies born preterm <30 weeks' gestation, and admitted  
125 to an NHS neonatal unit, between January 2014 to December 2022. All maternity units in  
126 England, Scotland and Wales were included, excepting the five units in England that took  
127 part in the original PReCePT pilot study(15) and were therefore not part of the NPP.

## 128 **Data sources**

129 Data on eligible babies and their mothers were obtained from the National Neonatal  
130 Research Database (NNRD), which holds individual-level, pseudonymised, routinely  
131 collected patient data on babies admitted to an NHS neonatal unit. Costs associated with  
132 the NPP were estimated in the original evaluation(12).

## 133 **Effectiveness evaluation**

### 134 *Outcome*

135 The main implementation outcome was MgSO<sub>4</sub> uptake over time. MgSO<sub>4</sub> uptake was  
136 defined as the proportion of eligible mothers recorded as receiving MgSO<sub>4</sub> at a maternity  
137 unit, expressed as a percentage. For consistency with nationally reported data, mothers  
138 with missing MgSO<sub>4</sub> data were excluded from this calculation. This was computed per

139 month per unit, and reported as a percentage. For consistency with nationally reported data  
140 only data on singletons and the first born (i.e. one infant) from each multiple birth were  
141 included in the calculation.

#### 142 *Descriptive analysis*

143 Maternity unit, population characteristics, and MgSO<sub>4</sub> use were descriptively reported by  
144 nation and time-period.

#### 145 *Primary analysis*

146 Primary analysis was an interrupted time series using English data aggregated to the  
147 national level (mean national MgSO<sub>4</sub> uptake per month, across all English maternity units). A  
148 multivariable linear regression model was used to estimate the difference in mean MgSO<sub>4</sub>  
149 uptake from before (the 1-year period before) to after (the four-years follow-up)  
150 implementation of the NPP in England. The model adjusted for an underlying linear time  
151 trend, and mother and baby characteristics aggregated nationally per month (mean  
152 maternal age, Index of Multiple Deprivation (IMD) decile(16), baby's birthweight adjusted  
153 for gestational age as a z-score, and proportion reported smokers, white British ethnicity,  
154 type of birth (c-section versus vaginal delivery), and multiple births. The model was further  
155 adjusted for a non-linear temporal component to account for the ceiling effect and  
156 reduction in rate of change at levels close to the ceiling. Data on paternal age and ethnicity  
157 were explored as potential confounding factors, but were excluded due to high levels of  
158 missing data, and expected collinearity with other variables (maternal and paternal age  
159 tends to correlate, as does maternal and paternal ethnicity). Potential interaction was  
160 explored between mean MgSO<sub>4</sub> uptake and level of maternity unit (Neonatal Intensive Care



161 Unit (NICU), the highest-level unit versus Special Care Baby Unit (SCBU) or Local Neonatal  
162 Unit (LNU), lower level units)). This was because it was anticipated that performance might  
163 differ by type of unit: data from the original study indicated that smaller units tended to  
164 have lower starting uptake levels, so more room for improvement compared to larger  
165 NICUs.

#### 166 *Sensitivity and subgroup analyses*

167 As sensitivity analyses the above model was run on data aggregated to (a) the maternity-  
168 unit-level rather than the national level, and (b) the individual rather than national level.  
169 These two models additionally adjusted for type of maternity unit (NICU vs SCBU/LNU),  
170 regional clustering by AHSN, and were weighted on the number of eligible births per unit  
171 per month. Other sensitivity analyses included assessing (c) the impact of excluding a ‘fuzzy’  
172 implementation start window of +/-2 months, to account for some units starting slightly  
173 earlier or later than their officially recorded start date; (d) the impact of excluding the final 2  
174 months of data, due to concerns about completeness of the most recent data for some  
175 units; (e) the impact of using a longer pre-NPP comparison period of four years; and (f) the  
176 impact of including more mature pre-term babies up to 34 weeks’ gestation in the analysis.  
177 A sub-group analysis was performed on the 40 units that had participated in a connected  
178 study, an RCT nested within the main NPP(17), as their performance could plausibly differ  
179 from other maternity units.

#### 180 **Economic evaluation**

181 *MgSO<sub>4</sub> treatment cost-effectiveness*

182 Economic analysis combines evidence of the treatment ( $\text{MgSO}_4$ ) effect with evidence of the  
183 implementation (NPP) effect(18). For the former, estimates of the cost-effectiveness of  
184  $\text{MgSO}_4$  treatment were adopted from Bickford and colleagues' results(6, 19, 20), with their  
185 estimates converted to GBP currency and 2019 prices (Supplementary Table 1). This analysis  
186 accounts for the health impacts and cost savings of  $\text{MgSO}_4$  administered in births <30 and  
187 <32 weeks' gestation.

#### 188 *NPP implementation costs and effectiveness*

189 The mean implementation cost per unit of the NPP was estimated from data supplied by the  
190 NPP team and PReCePT study team, and reported previously(12, 17). The total cost of the  
191 NPP at a national level was estimated at £936,747(12) (which includes the funded backfill of  
192 clinical time for NPP 'champion' midwives at each maternity unit, and regional support from  
193 AHSNs).

194 From the multivariable linear regression model described above, we estimated the NPP  
195 effectiveness as the difference between the predicted level of  $\text{MgSO}_4$  use over time  
196 compared to a counterfactual level of  $\text{MgSO}_4$  use, representing what may have occurred in  
197 the absence of the NPP, assuming a continuation of the pre-NPP trend in  $\text{MgSO}_4$  uptake. The  
198 main measure of NPP effectiveness was the area-between-the-curves. Primary analysis used  
199 a linear distribution to estimate the counterfactual based on the pre-NPP predicted trend.  
200 Sensitivity analysis used a beta distribution to estimate this counterfactual, to account for  
201  $\text{MgSO}_4$  uptake as a proportion.

#### 202 *Policy cost-effectiveness analysis*

203 The cost-effectiveness analysis was conducted from a societal lifetime perspective. Net  
204 monetary benefit (NMB) of the NPP was estimated over the four years since its launch, by  
205 combining analysis of the costs and effectiveness of the NPP with the lifetime societal cost,  
206 and health gains associated with MgSO<sub>4</sub> treatment. This analysis used a framework  
207 previously developed to conduct economic evaluations of implementation initiatives(21). A  
208 willingness-to-pay threshold of £20,000 per Quality Adjusted Life Year (QALY) gained was  
209 used to determine NPP cost-effectiveness, following NICE guidelines(22). A positive NMB  
210 indicated that the implementation initiative was cost-effective. The net increment of the  
211 number of patients that received MgSO<sub>4</sub>, and the implementation cost-effectiveness per  
212 additional patient treated, was also estimated. The analysis used the area-between-the-  
213 curves estimate of NPP effectiveness with a linear counterfactual, and a sensitivity analysis  
214 using a beta counterfactual.

215 Probabilistic analysis was conducted using a Monte Carlo simulation with 10,000 samples  
216 drawn from parameter distributions. Point estimates, probabilistic distribution assumptions,  
217 and parameter source estimates are reported in Supplementary Table 2. Cost-effectiveness  
218 planes and cost-effectiveness acceptability curves were plotted for willingness-to-pay  
219 thresholds from zero to £100,000 per QALY gained for the policy cost-effectiveness of the  
220 NPP intervention.

#### 221 *Secondary economic analysis*

222 As evidence on the lifetime cost-effectiveness of antenatal MgSO<sub>4</sub> covers babies born up to  
223 32 weeks' gestation, cost-effectiveness analysis was performed only for babies <30 and <32  
224 weeks' gestation.

225 Statistical software Stata version 17 and R version 4.3.1 were used for all statistical analyses.

## 226 **RESULTS**

### 227 **Baseline characteristics**

228 In 2017, the year before NPP roll-out, a total of 4091 babies born under 30 weeks'  
229 gestational age were admitted to neonatal units in England, 296 in Scotland, and 182 in  
230 Wales. The majority of births were in maternity units with a NICU (62.6% in England, 83.5%  
231 in Scotland, 63.0% in Wales). Other than the number of babies admitted, study populations  
232 were largely comparable across the three nations with respect to other covariates (Table 1).

### 233 **Historical trends**

234 In 2014, MgSO<sub>4</sub> uptake was around 20% in England, 40% in Scotland, and 10% in Wales.  
235 Uptake improved over time in all three nations, with the rate of change slowing down at  
236 higher levels of treatment (ceiling effect). Although national levels appeared to converge in  
237 the latest 2022 data, there was visual suggestion that since the launch of the NPP, uptake  
238 may have been accelerated in England compared to the devolved nations. However, due to  
239 relatively smaller numbers, there was high variation in monthly uptake for Scotland and  
240 Wales, which limited formal assessment of parallel trends (Figure 1).

### 241 **Pre/post-NPP comparison**

242 In England, overall MgSO<sub>4</sub> uptake rose from 65.8% in 2017 to 85.5% in 2022 (62.3% to 81.4%  
243 in Scotland, 61.6% to 86.6% in Wales). The amount of missing data fell from around 5% in  
244 2017 to under 1% in 2022. Imminent delivery was the most commonly recorded reason for  
245 not giving MgSO<sub>4</sub>, accounting for around 15% of eligible babies in 2017, dropping to around

246 10% in England and Wales in 2022. The number recorded as not offered MgSO<sub>4</sub> fell from  
247 around 7% to around 1% across all three nations (Supplementary Table 3).

#### 248 **Estimate of NPP effectiveness**

249 The adjusted model estimated an average 5.8 (95% CI 2.7 to 8.9, p<0.001) percentage point  
250 increase in MgSO<sub>4</sub> uptake in England across the four years post-NPP, compared to the one  
251 year pre-NPP. Much of the gains appeared to take place as a step-change in the first two  
252 years of the programme. There were additional gains in years three and four (at which point  
253 the improvement became statistically significant), although confidence intervals overlap  
254 with estimates from the first two years (Table 2).

255 Estimates were robust to sensitivity analyses (Table 2). There was indication of greater  
256 improvement in MgSO<sub>4</sub> use when including babies up to 34 weeks' gestational age in the  
257 analysis (8.7 percentage point increase in MgSO<sub>4</sub> uptake, 95%CI 6.4 to 11.0, p<0.001), and in  
258 the 40 units in the PReCePT RCT (8.6 percentage point increase in MgSO<sub>4</sub> uptake, 95%CI 2.4  
259 to 14.9, p=0.007). There was some evidence that lower-level maternity units improved more  
260 than higher-level units (SCBUs and LNU: 9.1 percentage points change, 95%CI 3.9 to 14.3,  
261 p=0.001. NICUs: 4.1 percentage points change, 95%CI 0.6 to 7.6, p=0.022), reflecting the fact  
262 that NICUs tended to have higher starting levels.

#### 263 **Impact of the COVID-19 pandemic**

264 In 2020 there was a slight declining trend in MgSO<sub>4</sub> use coinciding with the start of the  
265 COVID-19 pandemic, which continued to the end of the dataset at the end of 2022. The use  
266 of antenatal steroids (another, more well-established protective treatment for preterm  
267 babies) had an almost identical decline over this same period (Supplementary Figure 1).

268 **Economic evaluation**

269 The impact of the NPP is illustrated in Figure 2, using a linear distribution (Figure 2a) and a  
270 beta distribution (Figure 2b) as counterfactuals. Probabilistic analysis estimated that the  
271 additional use of MgSO<sub>4</sub> attributed to the NPP was equivalent to 3.0 percentage point  
272 improvement on average over seven months, which equates to an additional 64 of the 2136  
273 pre-term (<30 weeks' gestation) babies receiving treatment (Table 3). The lifetime and  
274 societal NMB of the NPP was about £597000, or £279 per preterm baby. The probability of  
275 the NPP being cost-effective was 89% (Table 3, Supplementary Figure 2).

276 The sensitivity analysis with the beta distribution counterfactual, estimated a longer period  
277 of impact (an additional three months) over which there was additional use of MgSO<sub>4</sub>  
278 attributed to the NPP equivalent to a 2.9 percentage point improvement on average over 10  
279 months, which equates to an additional 92 of 3129 pre-term babies receiving treatment  
280 (Figure 2b). Accounting for the total cost of the NPP, and the lifetime health gains and cost  
281 savings of MgSO<sub>4</sub> treatment, the NMB was estimated to be £1.3m, or £400 per preterm  
282 baby. The probability of the NPP being cost-effective in this analysis was 100% (Table 3).

283 Expanding the analysis to include babies up to 32 weeks' gestation estimated additional use  
284 of MgSO<sub>4</sub> attributed to the NPP equivalent to a 4.4 percentage point improvement on  
285 average over nine months, which equates to an additional 215 pre-term babies treated. As  
286 the total cost of the NPP was fixed, and not sensitive to the number of babies treated, the  
287 NMB of the NPP was about £4.2m, or £853 per pre-term baby. The probability of NPP being  
288 cost-effective was 100% at the willingness-to-pay threshold of £20,000 per QALY gained  
289 (Supplementary Table 4 and Supplementary Figure 3). For the sensitivity analysis with the

290 beta distribution the NMB of NPP was about £5.4m, or £700 per preterm baby. The  
291 probability of cost-effectiveness was 100% (Supplementary Table 4).

292 Expanding the analysis further again to include babies up to 34 weeks' gestation shows that  
293 the additional use of MgSO<sub>4</sub> attributed to the NPP was equivalent to 7.3 percentage point  
294 improvement on average over seven months. This means an additional 961 babies receiving  
295 treatment. Using a beta distribution for the counterfactual showed a 6.5 percentage point  
296 improvement attributed to the NPP over 12 months (698 additional patients). The NMB of  
297 the NPP was not calculated for this more mature group of preterm babies, as currently there  
298 is no available estimate for the cost-effectiveness of MgSO<sub>4</sub> treatment for babies born  
299 above 31<sup>+6</sup> weeks' gestation.

## 300 **DISCUSSION**

301 The original NPP evaluation found evidence of improved MgSO<sub>4</sub> use over the first 12 months  
302 following implementation. This extended evaluation found that the improvements have  
303 largely been sustained over the first four years following implementation, although there  
304 was suggestion of a slight decline in use coinciding with the pandemic. The benefits applied  
305 both to the target population of births <30 weeks' gestation, but also to more mature  
306 preterm babies up to 34 weeks' gestation. The programme was associated with a net  
307 monetary benefit of about £0.6m for babies up to 29 weeks' gestation, rising to about  
308 £4.2m when babies up to 31 weeks' gestation are included. Compared to the devolved  
309 nations, uptake appeared to improve faster in England in the first two years following the  
310 NPP launch. By the end of 2022 however, the three nations were broadly comparable with  
311 delivery of MgSO<sub>4</sub> to around 81-87% of eligible mothers. This is at the higher end of levels

312 reported internationally (69% to 87%(23-26)) following guidelines or interventions to  
313 increase MgSO<sub>4</sub> uptake.

314 Comparisons between England, Scotland, and Wales should be interpreted with caution:  
315 firstly because there is high variability due to small numbers in the devolved nations data,  
316 which limits formal statistical comparison of trends. Secondly because Scotland and Wales  
317 were implementing their own MgSO<sub>4</sub> initiatives (e.g. MCQIC(27), PERIPrem Cymru(28)),  
318 complicating their position as a control group. Thirdly because there was also accessing of  
319 the English PReCePT toolkit and implementation resources during this time period (66  
320 downloads from Wales, 32 from Scotland, 2018-2022, AHSN data, unpublished). This  
321 'contamination' means that the boundaries of the target population are fuzzy, and again the  
322 devolved nations cannot be considered optimal controls. Finally, the three nations' trends in  
323 uptake prior to the NPP were also not parallel, due to variation in starting levels in 2014,  
324 and this meant that formal statistical comparison of their improvements (for example  
325 including all three nations in an interrupted time series or difference in difference analysis)  
326 was not appropriate.

327 The COVID-19 pandemic could plausibly have impacted on MgSO<sub>4</sub> use: the broad impact on  
328 staffing and quality of care affecting all parts of the NHS(29), and a specific impact on  
329 expecting mothers who may have presented at hospital later due to concerns about  
330 infection and giving birth alone, could both lead to missed opportunities to give MgSO<sub>4</sub>(30,  
331 31). Analysis of future data will be important to explore what may be a temporary negative  
332 effect of the pandemic, versus what might be a natural waning of the initially positive  
333 effects of the NPP. From the observation that antenatal steroid use (historically well-  
334 established at high levels) declined almost identically to MgSO<sub>4</sub> use over the pandemic



335 period, the national decline may be associated with the pandemic. This finding is concerning  
336 and may illustrate the fragility of complex healthcare systems. Further follow up is  
337 important to monitor both metrics.

338 The observation of greater improvements in uptake when including more mature preterm  
339 births (all babies born up to 34 weeks' gestation) is interesting. While the more mature  
340 preterm infants represent a much larger proportion of preterm births, interpretation is  
341 complex; their profile of underpinning antenatal disease, and hence their presentation to  
342 healthcare, may vary from the more extreme preterm presentation. This could be expected  
343 to impact on the subsequent ease of delivering antenatal MgSO<sub>4</sub>. Evidence on the protective  
344 effect of MgSO<sub>4</sub> in babies 30-34 weeks' is less clear(3, 32, 33) and although long term  
345 neurological impacts remain higher in these groups than term-born peers(34), due to their  
346 greater numbers, even small shifts in risks may have substantial population benefits(35).

347 It is likely to be more difficult to improve from 85% to 90% uptake, compared to improving  
348 from 65% to 70% uptake. Further overall increases in MgSO<sub>4</sub> use may be a challenge without  
349 concerted effort at the lower-performing units. However, as some units do report higher  
350 (>90%) uptake (perhaps through better triaging and monitoring of symptoms), we argue  
351 that their performance should be used as the benchmark for quality of care, and investment  
352 in supporting the lower-performing units is likely to be cost-effective.

353 The creation of clinical guidelines alone is often not enough to ensure that evidence-based  
354 interventions become standard practice. A relevant example here is the case of antenatal  
355 steroids, which in the absence of a programme dedicated to getting this evidence into  
356 practice, took several decades for their use to become standard care. In contrast, and in the

357 context of the NPP, the same improvements in use of MgSO<sub>4</sub> were achieved within a few  
358 years.

### 359 **Strengths and limitations**

360 This evaluation included effectiveness and cost-effectiveness analysis to capture the impact  
361 of the NPP implementation. These types of analysis have been highlighted as key  
362 components of implementation science research(18, 36). Results from the main and  
363 sensitivity analyses were consistent. Data covered a period of eight years, giving adequate  
364 time for analysis of trends. The study benefitted from high quality, routinely collected,  
365 national, longitudinal patient-level data. The key advantages of this comprehensive real-  
366 world data is that it provides high generalisability (included all maternity units in England,  
367 Scotland, and Wales, reflecting the nationwide situation), shows effectiveness in real-world  
368 conditions, and is less vulnerable to some biases such as recall, observer, and attrition bias.  
369 A limitation is that this sort of data does not necessarily include all the covariates of interest,  
370 and data quality and completeness is not always consistent across all sites.

371 A key limitation is that residual confounding cannot be excluded. We have tried to minimise  
372 the impact of confounding through robust analytic methods, and interpret findings with  
373 caution. In addition to the PReCePT programme, there are other factors that likely will have  
374 impacted on uptake, including the publication of definitive evidence on the protective  
375 effective of MgSO<sub>4</sub> in 2009(37) MgSO<sub>4</sub> use being reliably recorded as a Neonatal Data  
376 Analysis Unit (NDAU) audit quality metric for maternity units in 2014-15, and its use  
377 becoming a formal recommendation in the NICE Guidance in 2015(2). Other factors related  
378 to PReCePT include the original pilot study publishing positive results in 2017; and  
379 discussions with unit leads about the proposed NPP in 2017. The National Neonatal Audit

380 Programme (NNAP) concluded in their report on 2020 data that “This rapid improvement [in  
381 MgSO<sub>4</sub> use], particularly seen in England, is likely to result from the targeted approach of  
382 the PReCePT quality improvement initiative.”(38)

383 Another limitation is that the population investigated here included liveborn babies  
384 admitted to a neonatal unit, rather than the total population of mothers eligible for MgSO<sub>4</sub>.  
385 The rate of MgSO<sub>4</sub> uptake may be different between these two populations, although any  
386 health benefit would only be realised in those investigated in this work. It would be an  
387 advantage if future research could explore, and compare, uptake in both populations, and  
388 the survival and neurodevelopmental outcomes for those preterm babies who did, and did  
389 not, receive MgSO<sub>4</sub>.

390 The Health Foundation and Health Data Research UK recently listed PReCePT as a case study  
391 model for a Learning Health System (i.e. a systematic approach to iterative, data-driven  
392 quality improvement(39)) and we propose that the PReCePT model could be used as an  
393 implementation blueprint for other quality improvement initiatives.

## 394 **CONCLUSIONS**

395 Implementation of the National PReCePT Programme has plausibly helped accelerate  
396 uptake of MgSO<sub>4</sub> in England, improving maternal and neonatal care, and positively  
397 impacting society in terms of direct patient benefit and future cost savings. Failure to deliver  
398 MgSO<sub>4</sub> to eligible mothers should be considered inadequate care, and not financially  
399 sustainable for the NHS. MgSO<sub>4</sub> as a quality metric should continue to be closely monitored,  
400 and further intervention may be warranted to achieve optimal treatment levels. Future

401 research should quantify the patient outcomes in this same population, specifically the  
402 cases of cerebral palsy prevented, associated with the improvements in use of MgSO<sub>4</sub>.

## 403 Abbreviations

|                   |                                                |
|-------------------|------------------------------------------------|
| CP                | Cerebral Palsy                                 |
| MgSO <sub>4</sub> | Magnesium Sulphate                             |
| NDAU              | Neonatal Data Analysis Unit                    |
| NMB               | Net Monetary Benefit                           |
| NNRD              | National Neonatal Research Database            |
| NPP               | National PReCePT Programme                     |
| PReCePT           | Prevention of Cerebral Palsy in PreTerm Labour |
| QI                | Quality Improvement                            |

404

## 405 REFERENCES

- 406 1. Organization) WWH. WHO recommendations on interventions to improve preterm birth  
407 outcomes. Switzerland; 2015. Contract No.: ISBN: 978 92 4 150898 8.
- 408 2. (NICE) NifHaCE. Preterm labour and birth (NG25). 2015.
- 409 3. Crowther CA, Middleton PF, Voysey M, Askie L, Duley L, Pryde PG, et al. Assessing the  
410 neuroprotective benefits for babies of antenatal magnesium sulphate: An individual participant data  
411 meta-analysis. PLOS Medicine. 2017;14(10):e1002398.
- 412 4. (NNAP) NNAP. Annual report 2018. UK: RCPH; 2018.
- 413 5. Odding E, Roebroek ME, Stam HJ. The epidemiology of cerebral palsy: Incidence,  
414 impairments and risk factors. Disability and Rehabilitation. 2006;28(4):183-91.
- 415 6. Bickford CD ML, Mitton C, Kruse M, Synnes AR, Sawchuck D, et al. Magnesium sulphate for  
416 fetal neuroprotection: a cost-effectiveness analysis. BMC Health Services Research. 2013;13(1):527.
- 417 7. Resolution N. NHS Resolution Annual report and accounts 2019/2020 London; 2020 July  
418 2020. Contract No.: HC 499.
- 419 8. Kobezda T, Rehm A. Live births with cerebral palsy at a tertiary maternity hospital: incidence  
420 and associated risk factors over a 17-year period. Journal of obstetrics and gynaecology : the journal  
421 of the Institute of Obstetrics and Gynaecology. 2022;42(7):2771-8.
- 422 9. O'Shea TM, Allred EN, Dammann O, Hirtz D, Kuban KCK, Paneth N, et al. The ELGAN study of  
423 the brain and related disorders in extremely low gestational age newborns. Early Human  
424 Development. 2009;85(11):719-25.
- 425 10. Vincer MJ, Allen AC, Joseph KS, Stinson DA, Scott H, Wood E. Increasing prevalence of  
426 cerebral palsy among very preterm infants: a population-based study. Pediatrics. 2006;118(6):e1621-  
427 6.

- 428 11. Himpens E, Van den Broeck C, Oostra A, Calders P, Vanhaesebrouck P. Prevalence, type,  
429 distribution, and severity of cerebral palsy in relation to gestational age: a meta-analytic review.  
430 *Developmental Medicine & Child Neurology*. 2008;50(5):334-40.
- 431 12. Edwards HB, Redaniel MT, Sillero-Rejon C, Margelyte R, Peters TJ, Tilling K, et al. National  
432 PRiCePT Programme: a before-and-after evaluation of the implementation of a national quality  
433 improvement programme to increase the uptake of magnesium sulfate in preterm deliveries.  
434 *Archives of Disease in Childhood - Fetal and Neonatal Edition*. 2023;108(4):342-7.
- 435 13. Proctor E, Luke D, Calhoun A, McMillen C, Brownson R, McCrary S, et al. Sustainability of  
436 evidence-based healthcare: research agenda, methodological advances, and infrastructure support.  
437 *Implement Sci*. 2015;10:88.
- 438 14. Edwards HB SRC, Pithara-McKeown C, De Vocht F, McLeod H, Redwood S, Hill L, Opmeer B,  
439 Odd D, Luyt K. PRiCePT Devolved Nations: Evaluation Report University of Bristol; 2024 5th February  
440 2024.
- 441 15. Burhouse A, Lea C, Ray S, Bailey H, Davies R, Harding H, et al. Preventing cerebral palsy in  
442 preterm labour: a multiorganisational quality improvement approach to the adoption and spread of  
443 magnesium sulphate for neuroprotection. *BMJ Open Quality*. 2017;6(2).
- 444 16. GOV.UK. National statistics: English indices of deprivation 2019. In: Ministry of Housing CLG,  
445 editor. 2019.
- 446 17. Edwards HB, Redaniel MT, Sillero-Rejon C, Pithara-McKeown C, Margelyte R, Stone T, et al.  
447 Quality improvement interventions to increase the uptake of magnesium sulphate in preterm  
448 deliveries for the prevention of cerebral palsy (PRiCePT study): a cluster randomised controlled trial.  
449 *BJOG: An International Journal of Obstetrics & Gynaecology*. 2023;n/a(n/a).
- 450 18. Proctor E, Silmere H, Raghavan R, Hovmand P, Aarons G, Bunger A, et al. Outcomes for  
451 implementation research: conceptual distinctions, measurement challenges, and research agenda.  
452 *Adm Policy Ment Health*. 2011;38(2):65-76.
- 453 19. Shih STF, Tonmukayakul U, Imms C, Reddihough D, Graham HK, Cox L, et al. Economic  
454 evaluation and cost of interventions for cerebral palsy: a systematic review. *Developmental  
455 medicine and child neurology*. 2018;60(6):543-58.
- 456 20. Cahill AG, Odibo AO, Stout MJ, Grobman WA, Macones GA, Caughey AB. Magnesium sulfate  
457 therapy for the prevention of cerebral palsy in preterm infants: a decision-analytic and economic  
458 analysis. *American Journal of Obstetrics & Gynecology*. 2011;205(6):542.e1-.e7.
- 459 21. Sillero-Rejon C HW, McLeod H, Opmeer B, Luyt K. Economic evaluation in implementation  
460 science: A reconciled approach evaluating programmes to increase the uptake of magnesium  
461 sulphate in pre-term births. Pre-print ed. ResearchSquare:  
462 <https://www.researchsquare.com/article/rs-2678140/v2>; 2023.
- 463 22. NICE. Developing NICE guidelines: the manual (PMG20). London: NICE; 2014.
- 464 23. Ow LL, Kennedy A, McCarthy EA, Walker SP. Feasibility of implementing magnesium sulphate  
465 for neuroprotection in a tertiary obstetric unit. *Australian and New Zealand Journal of Obstetrics and  
466 Gynaecology*. 2012;52(4):356-60.
- 467 24. Keir AK, Shepherd E, McIntyre S, Rumbold A, Groves C, Crowther C, et al. Antenatal  
468 magnesium sulfate to prevent cerebral palsy. *Archives of disease in childhood Fetal and neonatal  
469 edition*. 2022;107(2):225-7.
- 470 25. Chollat C, Bertrand E, Petit-Ledo A, de Vansay C, Voisin C, Dabaj I, et al. Cerebral Palsy in  
471 Very Preterm Infants: A Nine-Year Prospective Study in a French Population-Based Tertiary Center.  
472 *The Journal of Pediatrics*. 2021;237:183-9.e6.
- 473 26. Doyle LW, Spittle AJ, Olsen JE, Kwong A, Boland RA, Lee KJ, et al. Translating antenatal  
474 magnesium sulphate neuroprotection for infants born <28 weeks' gestation into practice: A  
475 geographical cohort study. *Aust N Z J Obstet Gynaecol*. 2021;61(4):513-8.
- 476 27. Scottish Patient Safety Programme (SPSP) Maternity and Children Quality Improvement  
477 Collaborative (MCQIC). In: Scotland HI, editor.: NHS Scotland; 2023.
- 478 28. PERIPrem Cymru for professionals. NHS Wales; 2023.

- 479 29. Jones H, Seaborne M, Cowley L, Odd D, Paranjothy S, Akbari A, et al. Population birth  
480 outcomes in 2020 and experiences of expectant mothers during the COVID-19 pandemic: A 'born in  
481 Wales' mixed methods study using routine data. *PLoS One*. 2022;17(5):e0267176.
- 482 30. Dasgupta T, Horgan G, Peterson L, Mistry HD, Balls E, Wilson M, et al. Women's experiences  
483 of maternity care in the United Kingdom during the COVID-19 pandemic: A follow-up systematic  
484 review and qualitative evidence synthesis. *Women and Birth*. 2024;37(3):101588.
- 485 31. Aydin E, Glasgow KA, Weiss SM, Khan Z, Austin T, Johnson MH, et al. Giving birth in a  
486 pandemic: women's birth experiences in England during COVID-19. *BMC Pregnancy Childbirth*.  
487 2022;22(1):304.
- 488 32. Crowther CA, Ashwood P, Middleton PF, McPhee A, Tran T, Harding JE, et al. Prenatal  
489 Intravenous Magnesium at 30-34 Weeks' Gestation and Neurodevelopmental Outcomes in  
490 Offspring: The MAGENTA Randomized Clinical Trial. *JAMA*. 2023;330(7):603-14.
- 491 33. Louis JM, Randis TM. Intrapartum Magnesium for Neuroprotection: Revisiting Gestational  
492 Age Criteria. *JAMA*. 2023;330(7):597-8.
- 493 34. Odd D, Evans D, Emond A. Preterm Birth, Age at School Entry and Long Term Educational  
494 Achievement. *PLOS ONE*. 2016;11(5):e0155157.
- 495 35. Odd D, Evans D, Emond AM. Prediction of school outcome after preterm birth: a cohort  
496 study. *Archives of disease in childhood*. 2019;104(4):348-53.
- 497 36. Hull L, Goulding L, Khadjesari Z, Davis R, Healey A, Bakolis I, et al. Designing high-quality  
498 implementation research: development, application, feasibility and preliminary evaluation of the  
499 implementation science research development (ImpRes) tool and guide. *Implementation Science*.  
500 2019;14(1):80.
- 501 37. Doyle LW, Crowther CA, Middleton P, Marret S, Rouse D. Magnesium sulphate for women at  
502 risk of preterm birth for neuroprotection of the fetus. *The Cochrane database of systematic reviews*.  
503 2009(1):Cd004661.
- 504 38. (NNAP) NNAP. Annual report 2020. UK: RCPH; 2020.
- 505 39. Hardie T HT, Thornton-Lee N, Home J, Pereira P. Developing learning health systems in the  
506 UK: Priorities for action. 2022 September 2022.

507

508

509

510

511

512

513

514

515

516

517

518

519

520

521

522

523 **Table 1: Baby, mother, and maternity unit characteristics by nation at baseline<sup>0</sup>**

|                                                                     | England             | Scotland            | Wales               |
|---------------------------------------------------------------------|---------------------|---------------------|---------------------|
| <b>Socio-demographic characteristics of babies</b>                  |                     |                     |                     |
| Number of babies (N) <sup>1</sup>                                   | 4091                | 296                 | 182                 |
| Gestational age (median weeks, IQR)                                 | 27.7<br>(26.0,28.9) | 27.9<br>(26.6,28.9) | 28.0<br>(26.6,28.9) |
| 22 weeks                                                            | 14 (0.3%)           | 0 (0.0%)            | 3 (1.7%)            |
| 23 weeks                                                            | 225 (5.5%)          | 12 (4.1%)           | 6 (3.3%)            |
| 24 weeks                                                            | 374 (9.1%)          | 24 (8.5%)           | 9 (5.0%)            |
| 25 weeks                                                            | 407 (10.0%)         | 19 (6.4%)           | 12 (6.6%)           |
| 26 weeks                                                            | 530 (13.0%)         | 34 (11.5%)          | 22 (12.1%)          |
| 27 weeks                                                            | 644 (15.7%)         | 58 (19.6%)          | 34 (18.7%)          |
| 28 weeks                                                            | 886 (21.7%)         | 74 (25.0%)          | 56 (30.8%)          |
| 29 weeks                                                            | 1011 (24.7%)        | 74 (25.0%)          | 40 (22.0%)          |
| Birthweight (median grams, IQR)                                     | 961<br>(760,1180)   | 1010<br>(780,1218)  | 1030<br>(782,1240)  |
| Male sex (N, %)                                                     | 2271 (55.5%)        | 156 (52.7%)         | 102 (56.0%)         |
| Multiple births (N, %)                                              | 1004 (24.5%)        | 78 (26.4%)          | 40 (22.0%)          |
| <b>Socio-demographic characteristics of parents</b>                 |                     |                     |                     |
| Number of mothers (N) <sup>2</sup>                                  | 3573                | 254                 | 162                 |
| Maternal age (years, mean, SD)                                      | 30.5 (6.1)          | 29.5 (5.9)          | 28.7 (6.0)          |
| Mothers reporting white British ethnicity (N, %)                    | 1793 (50.2%)        | 155 (61.0%)         | 116 (71.6%)         |
| Non-white British                                                   | 1186 (33.2%)        | 34 (13.4%)          | 15 (9.3%)           |
| Missing data                                                        | 594 (16.6%)         | 65 (25.6%)          | 31 (19.1%)          |
| Level of deprivation (IMD quintile, N, %) <sup>3</sup>              |                     |                     |                     |
| (Most deprived) 1                                                   | 1215 (34.0%)        | 88 (34.7%)          | 51 (31.5%)          |
| 2                                                                   | 804 (22.5%)         | 60 (23.6%)          | 30 (18.5%)          |
| 3                                                                   | 611 (17.1%)         | 33 (13.0%)          | 37 (22.8%)          |
| 4                                                                   | 487 (13.6%)         | 36 (14.2%)          | 20 (12.4%)          |
| (Least deprived) 5                                                  | 391 (10.9%)         | 28 (11.0%)          | 21 (13.0%)          |
| Missing data                                                        | 65 (1.8%)           | 9 (3.5%)            | 3 (1.9%)            |
| Any reported smoking history (N, %)                                 | 602 (16.9%)         | 38 (15.0%)          | 43 (26.5%)          |
| <b>Clinical characteristics of mothers</b>                          |                     |                     |                     |
| Hypertension in pregnancy (N, %)                                    | 163 (4.6%)          | 16 (6.3%)           | 5 (3.1%)            |
| Premature rupture of membranes (N, %)                               | 603 (16.9%)         | 49 (19.3%)          | 30 (18.5%)          |
| Caesarean section (N, %)                                            | 1888 (52.8%)        | 152 (59.8%)         | 87 (53.7%)          |
| Antenatal steroids given (N, %)                                     | 3268 (91.5%)        | 231 (90.9%)         | 149 (92.0%)         |
| <b>Maternity Unit characteristics</b>                               |                     |                     |                     |
| Total number of maternity units                                     | 150                 | 18                  | 12                  |
| With no neonatal service                                            | 3                   | 3                   | 2                   |
| With Special Care Baby Unit / Local Neonatal Unit                   | 106                 | 6                   | 7                   |
| With Neonatal Intensive Care Unit                                   | 41                  | 9                   | 3                   |
| Births per level of unit (N, %)                                     |                     |                     |                     |
| With no neonatal service                                            | 6 (0.2%)            | 6 (2.4%)            | 11 (6.8%)           |
| With Special Care Baby Unit / Local Neonatal Unit                   | 1329 (37.2%)        | 36 (14.2%)          | 49 (30.3%)          |
| With Neonatal Intensive Care Unit                                   | 2238 (62.6%)        | 212 (83.5%)         | 102 (63.0%)         |
| Average number of eligible births per hospital per month (mean, sd) | 2.8 (2.1)           | 2.3 (1.3)           | 2.1 (1.6)           |

524 0. Baseline period is means/proportions across Jan-Dec 2017, the year before the NPP was rolled-out in England.

525 1. Babies up to 30 weeks' gestational age. Descriptive data is on all babies including multiples. Analysis is restricted to singletons and first-born of multiples.

526 2. Unique mother IDs

527 3. English, Scottish and Welsh Indices of Multiple Deprivation are calculated differently and are not comparable between nations.

528

529



530 **Table 2: Change in MgSO<sub>4</sub> uptake in England from before to after the NPP<sup>0</sup>**

|                                                                             | Step-change in MgSO <sub>4</sub> uptake after intervention (percentage points) <sup>1</sup> | 95% CI       | p-value | Change in slope post-intervention compared to pre-intervention | 95% CI         | p-value | Overall slope post-intervention | 95% CI        | p-value |
|-----------------------------------------------------------------------------|---------------------------------------------------------------------------------------------|--------------|---------|----------------------------------------------------------------|----------------|---------|---------------------------------|---------------|---------|
| Unadjusted <sup>2</sup>                                                     | 11.8                                                                                        | 10.0 to 13.6 | <0.001  | -                                                              | -              | -       |                                 |               |         |
| Fully adjusted <sup>3</sup>                                                 | 5.8                                                                                         | 2.7 to 8.9   | <0.001  | -0.87                                                          | -1.18 to -0.57 | <0.001  | 0.02                            | -0.06 to 0.10 | 0.622   |
| <b>Cumulative increase per-year across the follow-up period<sup>2</sup></b> |                                                                                             |              |         |                                                                |                |         |                                 |               |         |
| Year 1                                                                      | 3.1                                                                                         | -1.3 to 7.4  | 0.167   | -0.76                                                          | -1.48 to -0.05 | 0.037   | 0.19                            | -0.31 to 0.69 | 0.450   |
| Year 1-2                                                                    | 3.5                                                                                         | -0.2 to 7.3  | 0.067   | -0.57                                                          | -0.91 to -0.23 | <0.001  | 0.25                            | 0.09 to 0.41  | 0.002   |
| Year 1-3                                                                    | 5.6                                                                                         | 2.1 to 9.1   | 0.002   | -0.86                                                          | -1.25 to -0.48 | <0.001  | 0.05                            | -0.05 to 0.16 | 0.302   |
| Year 1-4                                                                    | 5.8                                                                                         | 2.7 to 8.9   | <0.001  | -0.87                                                          | -1.17 to -0.57 | <0.001  | 0.02                            | -0.06 to 0.10 | 0.622   |
| <b>Secondary, sensitivity and sub-group analyses<sup>2</sup></b>            |                                                                                             |              |         |                                                                |                |         |                                 |               |         |
| Analysis at maternity-unit level <sup>4</sup>                               | 5.8                                                                                         | 2.8 to 8.8   | <0.001  | -0.83                                                          | -1.47 to -0.18 | 0.012   | 0.003                           | -0.05 to 0.06 | 0.923   |
| Analysis at individual-level <sup>4</sup>                                   | 5.9                                                                                         | 2.5 to 9.3   | 0.001   | -0.76                                                          | -1.17 to -0.34 | <0.001  | 0.02                            | -0.03 to 0.07 | 0.449   |
| Excluding implementation start window (2 months each side of start)         | 6.6                                                                                         | 2.9 to 10.3  | <0.001  | -0.86                                                          | -1.17 to -0.54 | <0.001  | -0.01                           | -0.09 to 0.07 | 0.820   |
| Excluding final 2 months (?data quality)                                    | 5.8                                                                                         | 2.6 to 8.9   | <0.001  | -0.82                                                          | -1.14 to -0.50 | <0.001  | 0.04                            | -0.04 to 0.12 | 0.346   |
| Comparing 4 years pre with 4 years post                                     | 6.0                                                                                         | 3.7 to 8.4   | <0.001  | -0.74                                                          | -0.82 to -0.65 | <0.001  | 0.01                            | -0.07 to 0.08 | 0.895   |
| PReCePT cRCT units only (n=40)                                              | 8.6                                                                                         | 2.4 to 14.9  | 0.007   | -0.79                                                          | -1.37 to -0.20 | <0.001  | 0.04                            | -0.09 to 0.16 | 0.563   |
| Including babies up to 34 weeks gestation                                   | 8.7                                                                                         | 6.4 to 11.0  | <0.001  | -0.69                                                          | -0.90 to -0.48 | <0.001  | 0.046                           | -0.02 to 0.11 | 0.157   |

531 <sup>0</sup> All data on singletons and first born of multiples <30 weeks' gestation and admitted to an NHS Neonatal unit

532 <sup>1</sup> Percentage point difference in uptake between mean across the 12m pre-NPP, and mean across the four years post-NPP<sup>2</sup> Crude regression of uptake post-implementation compared with pre-implementation.

533 <sup>3</sup> Fully adjusted model: includes interaction between pre-post period and study month to capture change in slope as well as step-change. Adjusted for covariates as monthly aggregates: mean maternal age,  
 534 proportion who identified as of white British ethnicity, mean IMD decile, proportion of multiple births, proportion with pregnancy hypertension, reported smokers, type of birth (c-section versus vaginal delivery),  
 535 birthweight adjusted for gestational age as a z-score. Model weighted on unit size.

536 <sup>4</sup> Additionally adjusted for level of birth unit, and regional clustering by AHSN.

537

538 **Table 3. Probabilistic Cost-Effectiveness Results of the NPP from Interrupted Time Series Analysis (<30 weeks' gestation)**

|                                                                                                | Main analysis<br>(linear distribution<br>counterfactual) | Sensitivity analysis<br>(beta distribution<br>counterfactual) |
|------------------------------------------------------------------------------------------------|----------------------------------------------------------|---------------------------------------------------------------|
| Period of benefit, months                                                                      | 7                                                        | 10                                                            |
| Number of pre-term babies ( $\leq 3$ weeks), $N$                                               | 2136                                                     | 3129                                                          |
| Change in proportion of pre-term babies treated with MgSO <sub>4</sub> , $\Delta b_i$ , %      | 3.0% (1.5%; 4.5%)                                        | 2.9% (2.3%; 3.6%)                                             |
| Net Increment of pre-term babies treated with MgSO <sub>4</sub> , $\Delta pat$                 | 64 (32; 97)                                              | 92 (72; 112)                                                  |
| Net cost of implementation, $\Delta C_i$ , £                                                   | 936747                                                   | 936747                                                        |
| Implementation cos-effectiveness, $\Delta C_i / \Delta Pat$ , £ per additional patient treated | 14576 (29284; 9669)                                      | 10219 (13040; 8386)                                           |
| Lifetime health effect of MgSO <sub>4</sub> treatment per patient, $\Delta bt$ , QALY          | 0.24 (0.16; 0.33)                                        | 0.24 (0.16; 0.33)                                             |
| Lifetime costs of MgSO <sub>4</sub> treatment per patient, $\Delta ct$ , £                     | -19064 (-13310; -25648)                                  | -19064 (-13310; -25648)                                       |
| Net Monetary Benefit of the Policy, $NMB_p$ , £ <sup>1</sup>                                   | 596538 (-221748; 1541786)                                | 1251511 (558115; 2071244)                                     |
| Probability of being cost-effective, %                                                         | 89%                                                      | 100%                                                          |

539 <sup>1</sup> At a willingness-to-pay threshold of £20,000 per QALY gained

540

541

542

543

544

545 **Figure 1: MgSO4 uptake in England, Scotland and Wales, 2014 to 2022**

546 **Figure 2: Predicted MgSO4 uptake, Counterfactual and Area-Between-Curves from Interrupted Time Series analyses**

547

Figure 1. MgSO<sub>4</sub> uptake in England, Scotland and Wales, 2014 to 2022

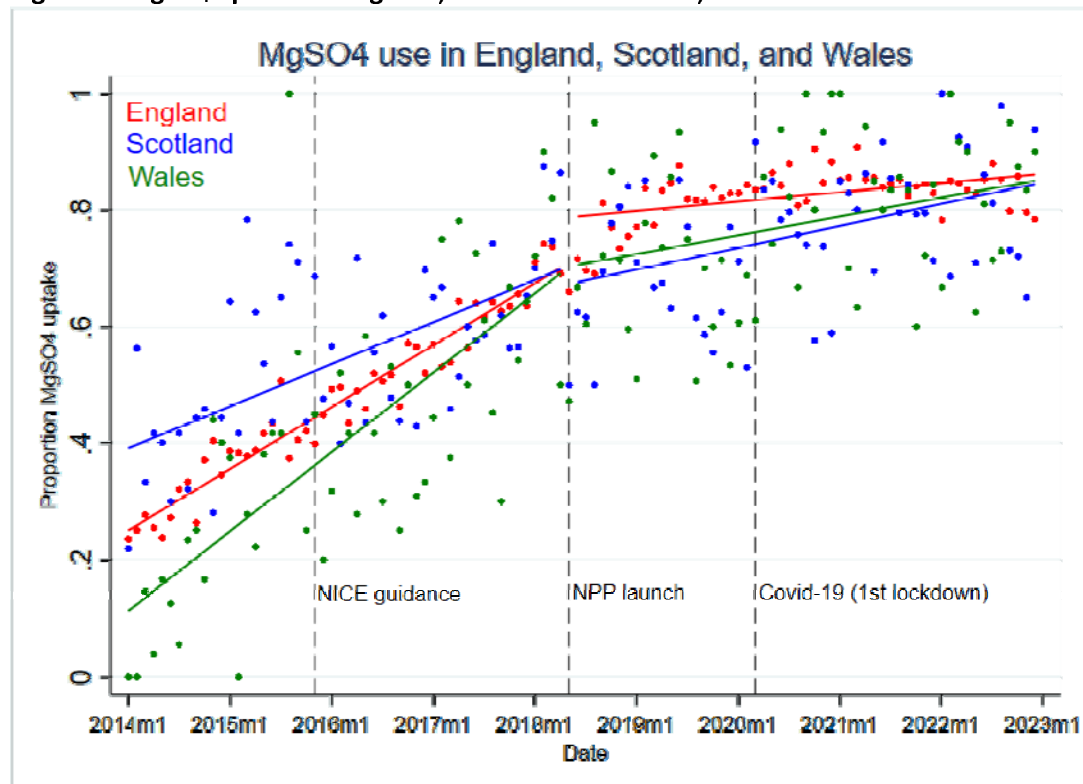

Figure 2. Predicted MgSO<sub>4</sub> uptake, Counterfactual and Area-Between-Curves from Interrupted Time Series analyses

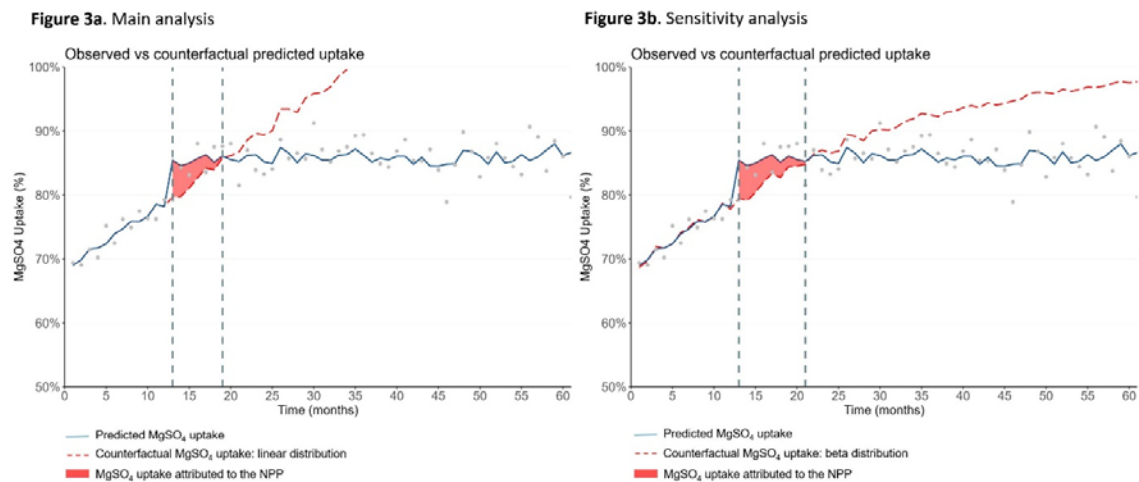

Source: https://medrxiv.org/content/10.1101/2024.07.16.24310419.full.pdf
